# Supplementary material for: Regioisomeric effects of dibenzofuran on the properties of boron–nitrogen multiple resonance emissive materials
Source: Royal Society of Chemistry journal article supplement (doi:10.1039/d3tc02708b), 2023-01-01
Supplement: d3tc02708b1.pdf [file d3tc02708b1.pdf]

## Supporting Information

### Regioisomeric Effects of Dibenzofuran on the Properties of Boron-Nitrogen Multiple Resonance Emissive Materials

Hongyang Li, <sup>a</sup> Hao Yan<sup>\*a</sup>, Lingqiang Meng, <sup>a</sup> Xiaopeng Zhang, <sup>a</sup> Changchun Kuang, <sup>a</sup> Zhiming Meng, <sup>a</sup> Yaowu He, <sup>a</sup> Hong Xu, <sup>a</sup> Xinkang Zhang, <sup>a</sup> Youxuan Zheng, <sup>b</sup> Chaoyi Yan, <sup>\*a</sup> and Hong Meng<sup>\*a</sup>

<sup>a</sup> School of Advanced Materials, Peking University Shenzhen Graduate School, Shenzhen, 518055, P. R. China

<sup>b</sup> Shenzhen Research Institute of Nanjing University, Shenzhen 518057, P. R. China,

E-mail: [yanhao@pku.edu.cn](mailto:yanhao@pku.edu.cn)

[menghong@pku.edu.cn](mailto:menghong@pku.edu.cn)

[yancy@pku.edu.cn](mailto:yancy@pku.edu.cn)

#### 1. Supplementary figures and tables

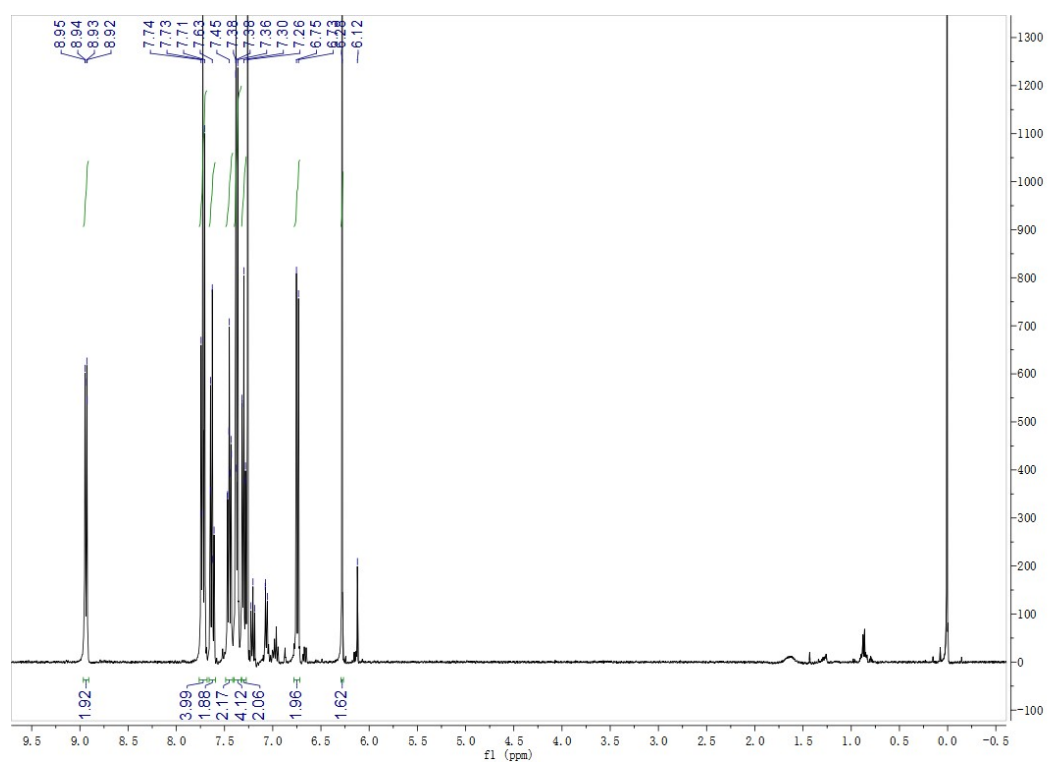

**Figure S1.**  $^1\text{H}$  NMR spectra of DABNA-Cl in  $\text{CDCl}_3$ .

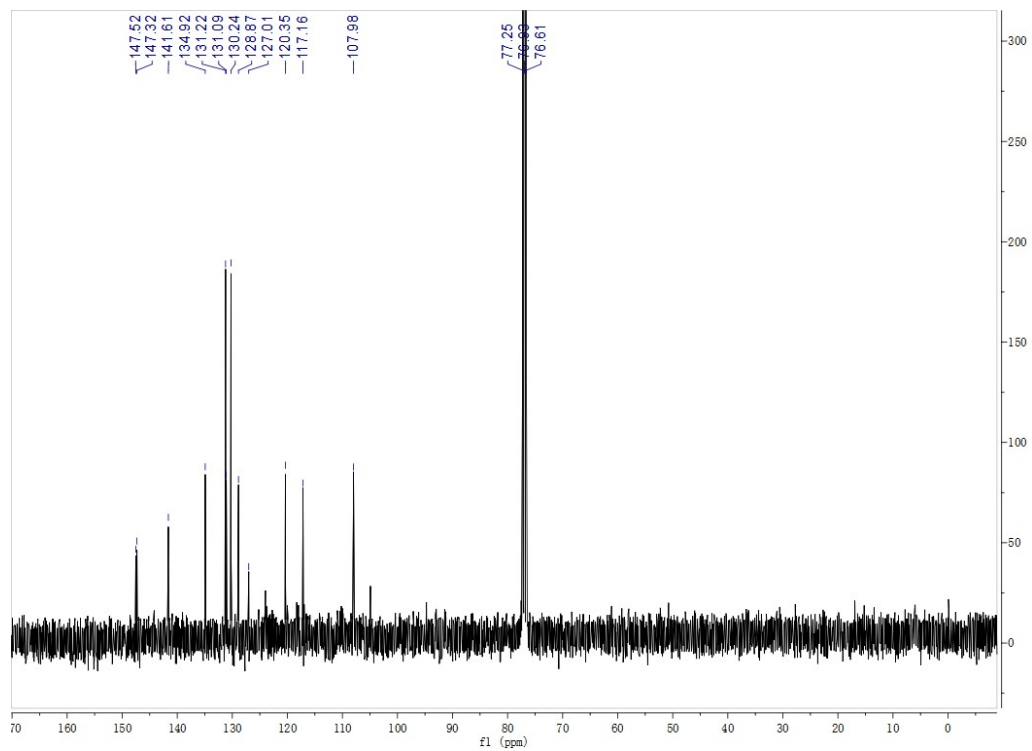

**Figure S2**  $^{13}\text{C}$  NMR spectra of DABNA-Cl in  $\text{CDCl}_3$ .

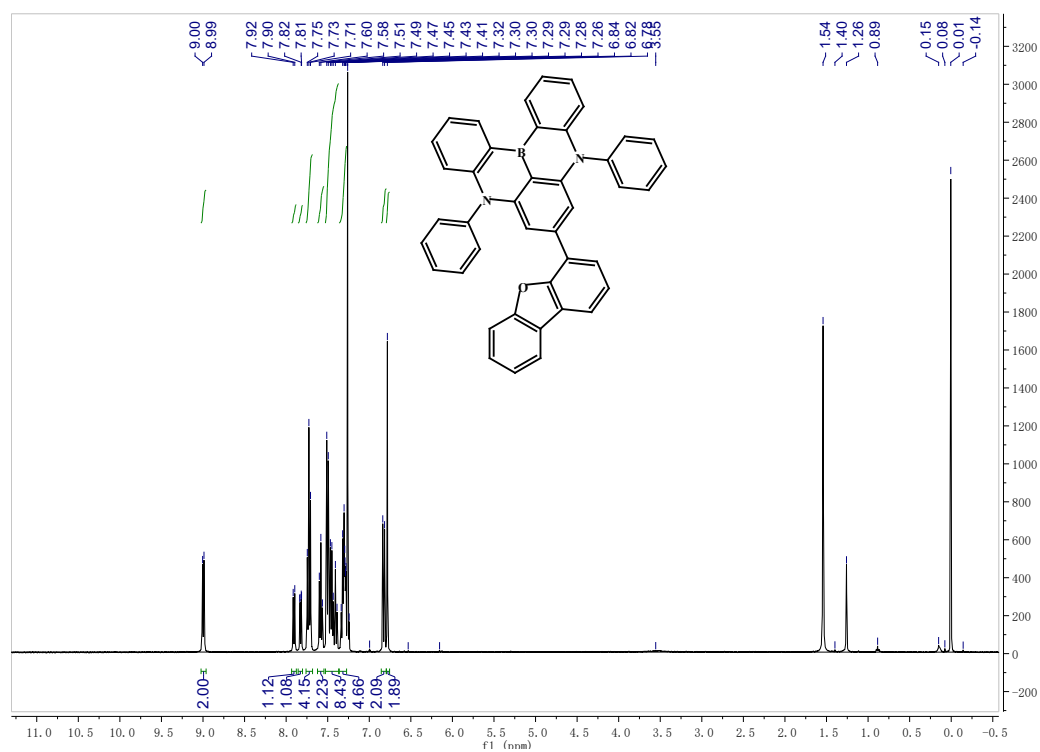

**Figure S3**  $^1\text{H}$  NMR spectra of DABNA-4-DBF in  $\text{CDCl}_3$ .

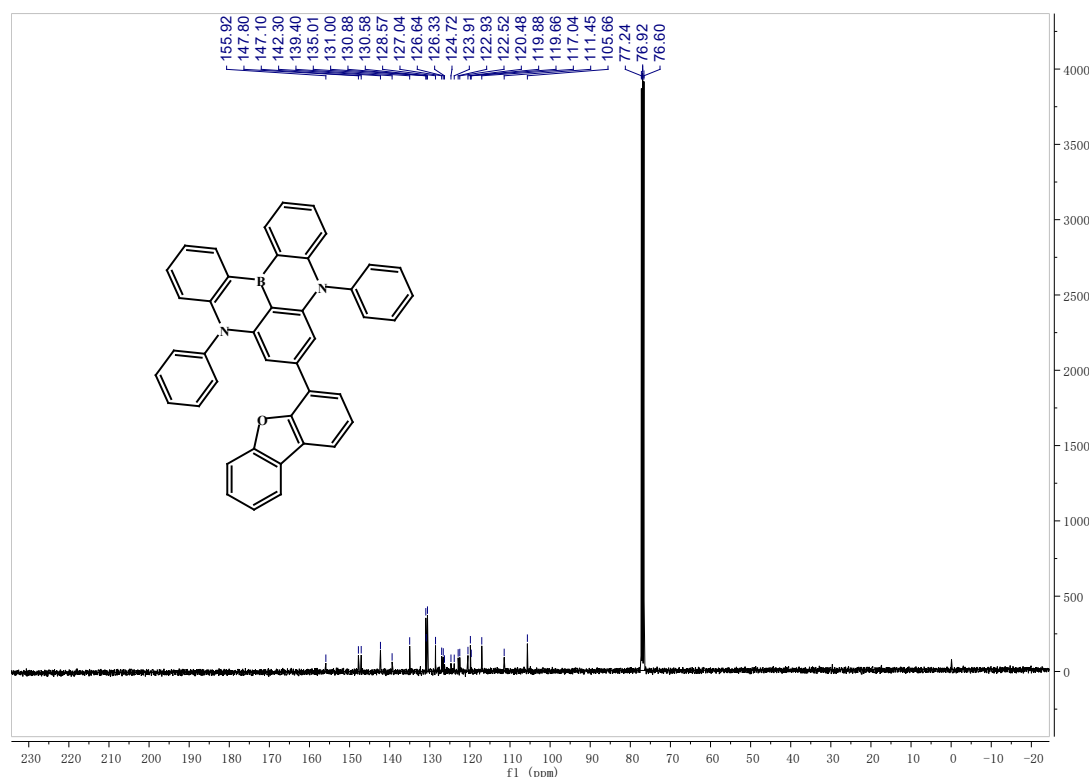

**Figure S4**  $^{13}\text{C}$  NMR spectra of DABNA-4-DBF in  $\text{CDCl}_3$ .



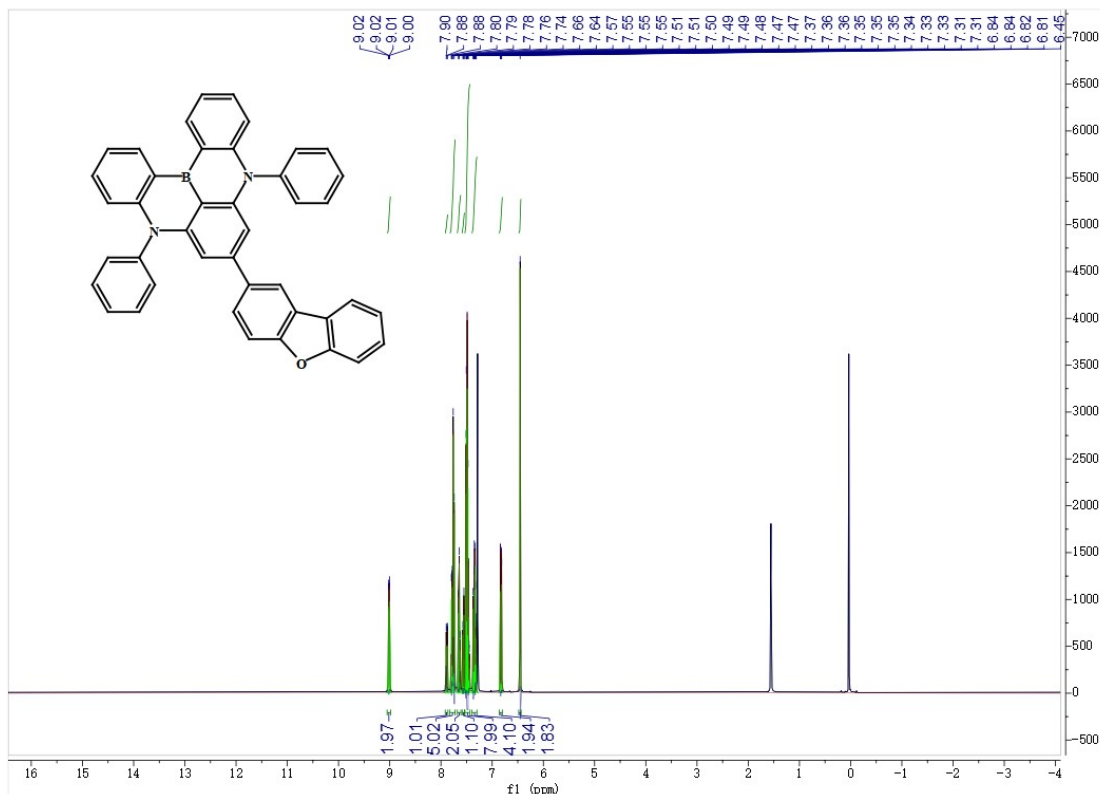

**Figure S7**  $^1\text{H}$  NMR spectra of DABNA-2-DBF in  $\text{CDCl}_3$ .

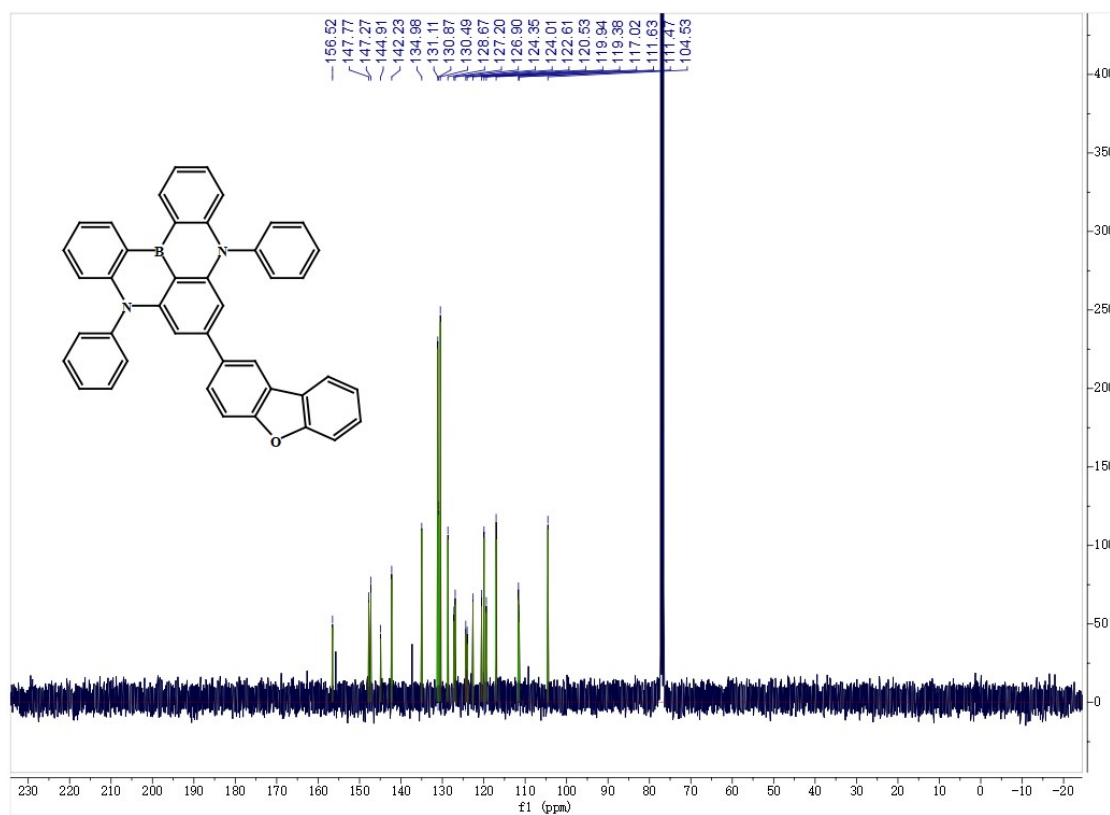

**Figure S8**  $^{13}\text{C}$  NMR spectra of DABNA-2-DBF in  $\text{CDCl}_3$ .

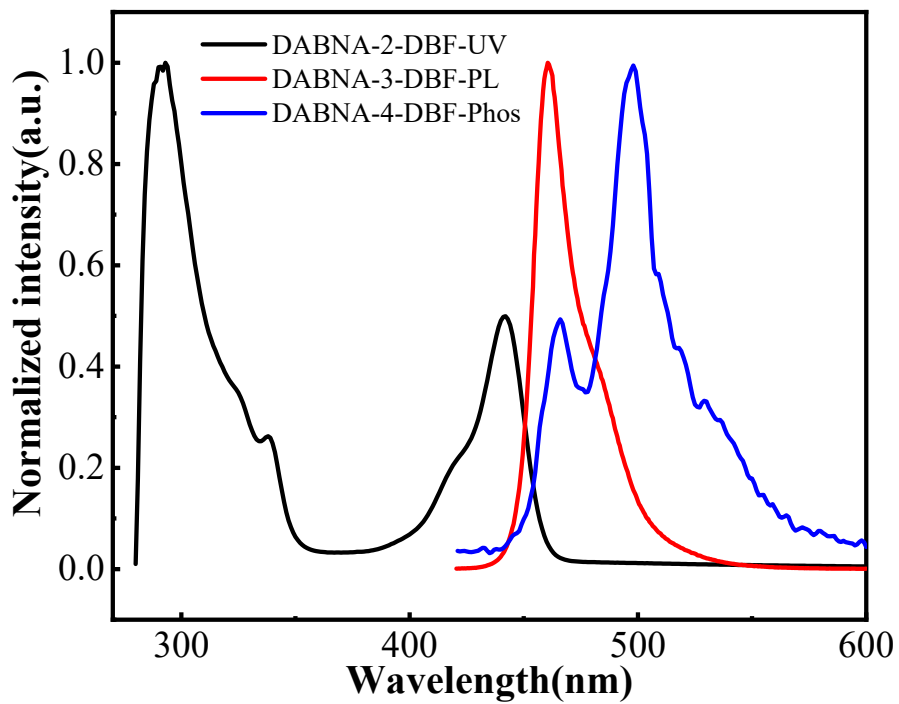

**Figure S9** a) The normalized UV-vis absorption (measures at 300 K) in diluted toluene solution. b) The normalized PL (measures at 300 K) in toluene. c) The normalized Phosphorescence (measures at 77K) 3% doped in m-CBP for DABNA-2-DBF

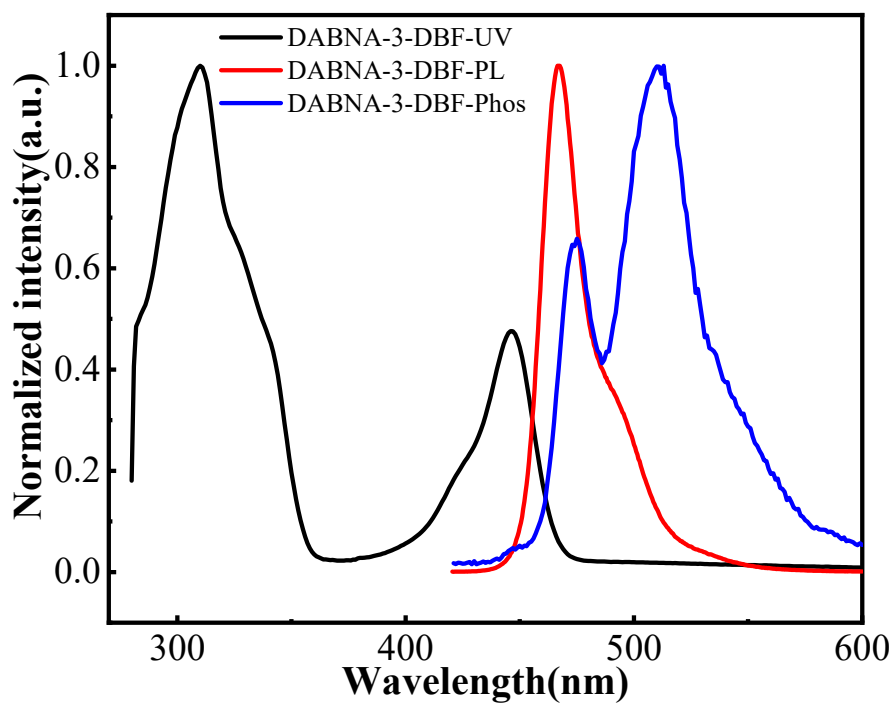

**Figure S10** a) The normalized UV-vis absorption (measures at 300 K) in diluted toluene solution. b) The normalized PL (measures at 300 K) in toluene. c) The normalized Phosphorescence (measures at 77K) 3% doped in m-CBP for DABNA-3-DBF

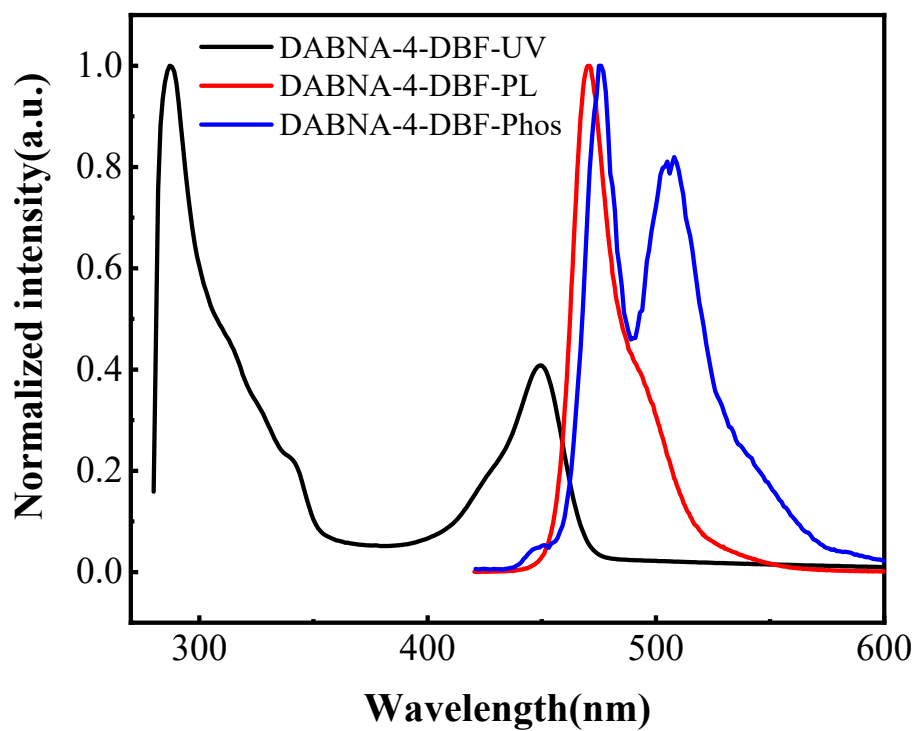

**Figure S11** a) The normalized UV-vis absorption (measures at 300 K) in diluted toluene solution. b) The normalized PL (measures at 300 K) in toluene. c) The normalized Phosphorescence (measures at 77K) 3% doped in m-CBP for DABNA-4-DBF



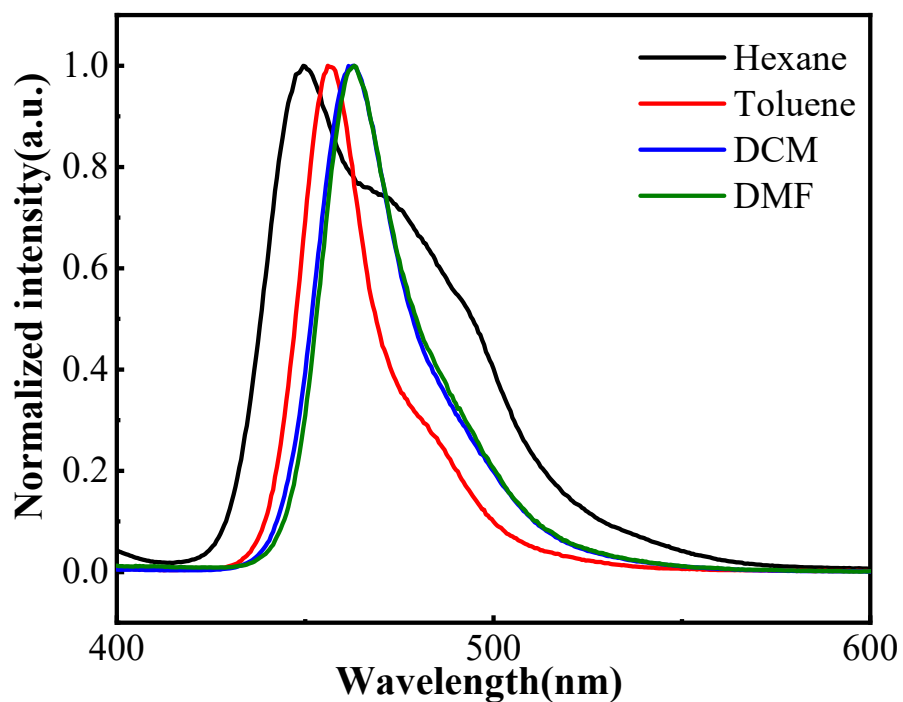

**Figure S12** The normalized PL of DABNA-2-DBF (measures at 300 K) in a) hexane. b) toluene. c) *dichloromethane (DCM)* and d) dimethyl formamide (DMF)

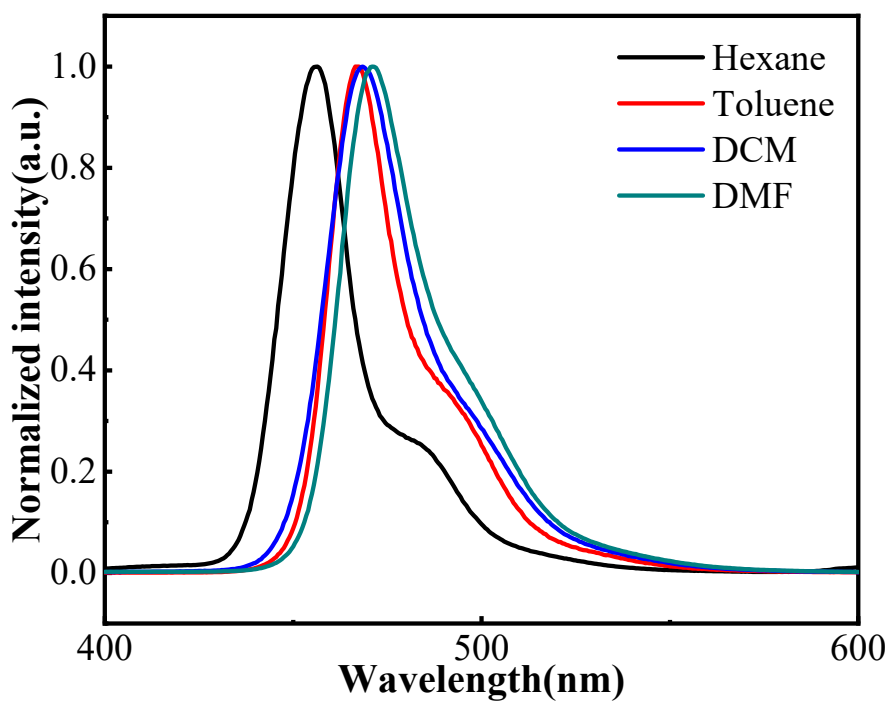

**Figure S13** The normalized PL of DABNA-3-DBF (measures at 300 K) in a) hexane. b) toluene. c) *dichloromethane (DCM)* and d) dimethyl formamide (DMF)

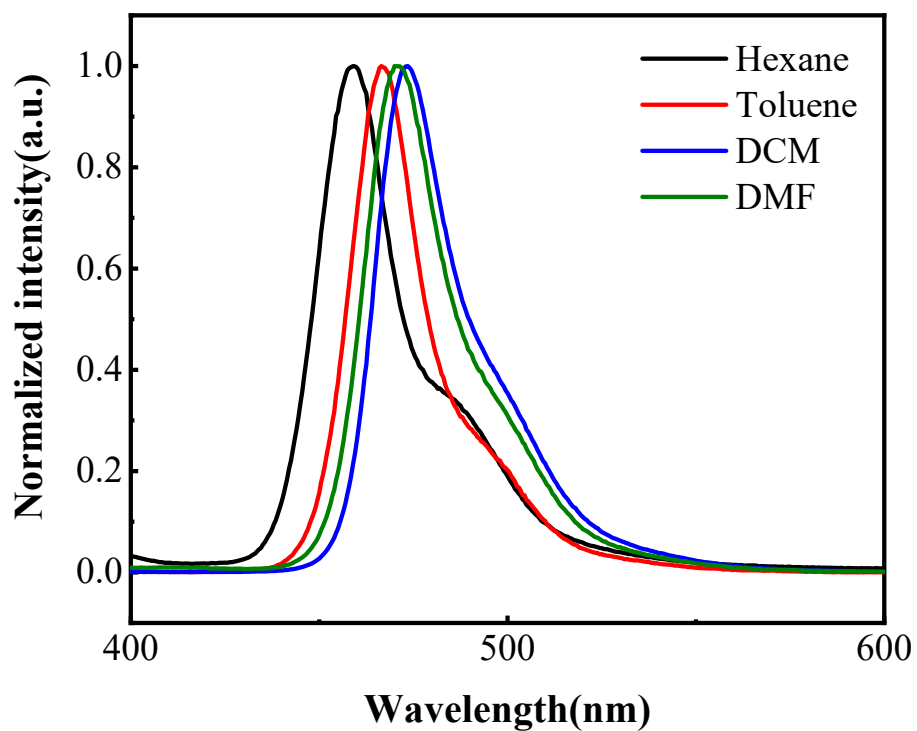

**Figure S14** The normalized PL of DABNA-4-DBF (measures at 300 K) in a) hexane. b) toluene. c) *dichloromethane (DCM)* and d) dimethyl formamide (DMF)

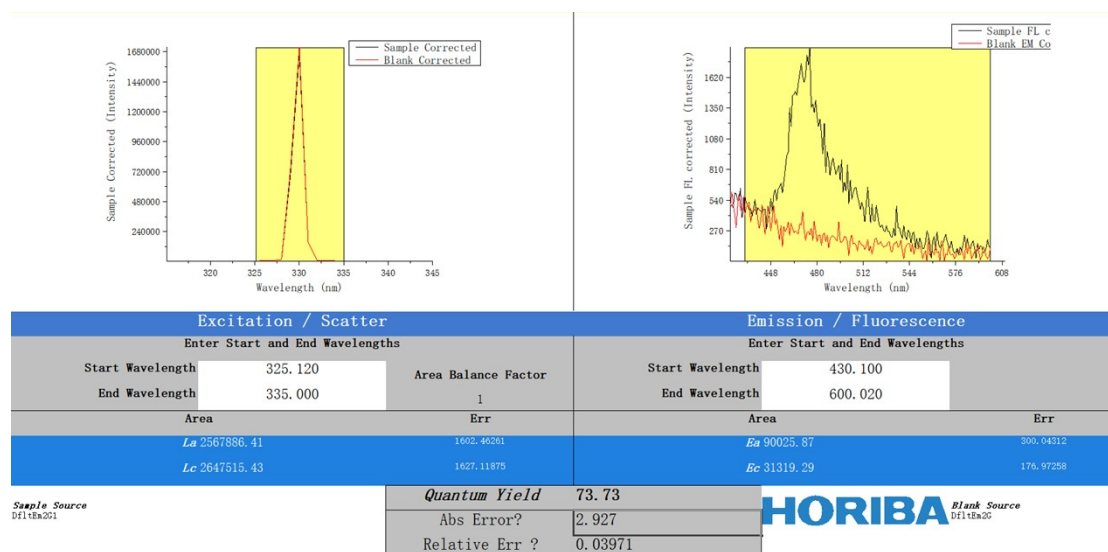

**Figure S15** The photoluminescence quantum yields (PLQY) for DABNA-2-DBF

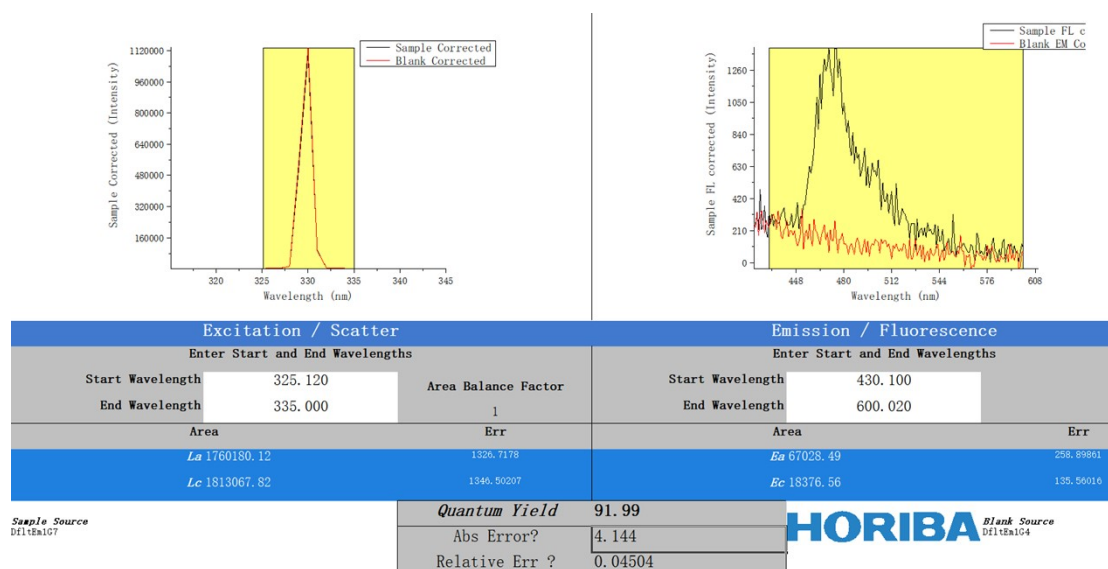

**Figure S16** The photoluminescence quantum yields (PLQY) for DABNA-3-DBF

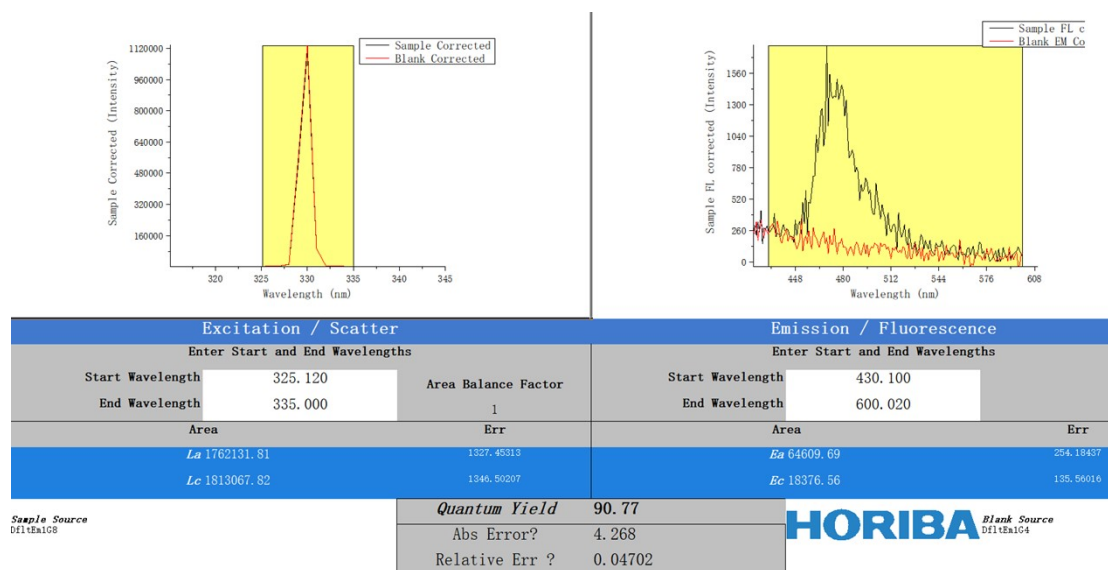

**Figure S17** The photoluminescence quantum yields (PLQY) for DABNA-4-DBF

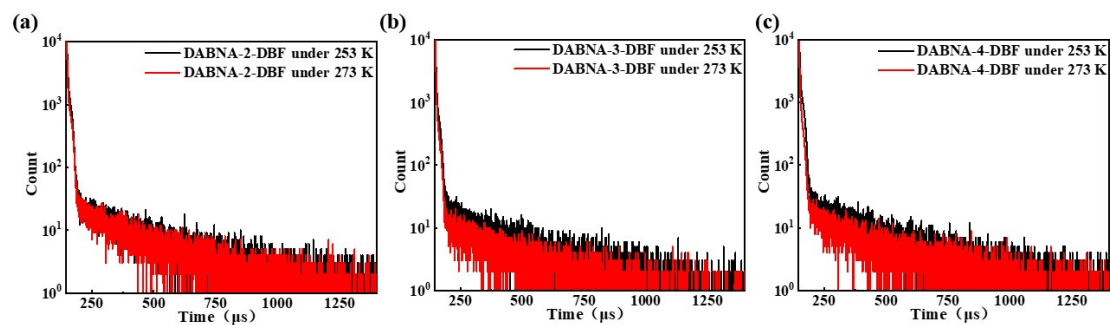

**Figure S18** Temperature dependent transient delay curves of (a) DABNA-2-DBF (b) DABNA-3-DBF and (c) DABNA-4-DBF.
